# Supplementary material for: Cross-species epigenetic regulation of nucleus accumbens KCNN3 transcripts by excessive ethanol drinking
Source: PubMed Central journal article supplement (PMC10682415; doi:10.1038/s41398-023-02676-z), 2023-11-27
Supplement: 41398_2023_2676_MOESM6_ESM.pdf [file 41398_2023_2676_MOESM6_ESM.pdf]

# Supplemental Figure 1

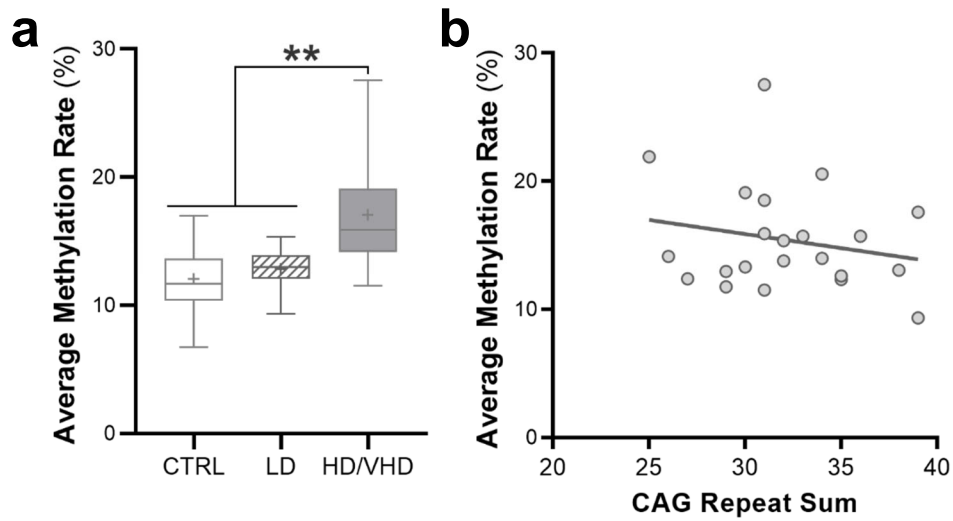

**Supplemental Fig. 1.** Averaged methylation rate (%) grouped by drinking class for all CpGs in male and female rhesus macaques. **a** The methylation rate was significantly higher in the HD/VHD (N = 15) compared to control (N = 13) and LD (N = 9) macaques ( $F(2, 34) = 9.860$ ,  $p = 0.0004$ , Tukey post-hoc,  $**p < 0.01$ ). **b** Lack of correlation between average methylation rate and CAG repeat sum ( $p = 0.3563$ )

# Supplemental Figure 2

|                | Hs 154,869,051                                                                                                                    | CCTTTGAGTAC | 154,869,041 |
|----------------|-----------------------------------------------------------------------------------------------------------------------------------|-------------|-------------|
|                | Rm 129,130,369                                                                                                                    | CCTTTGAGTAC | 129,130,359 |
|                | Mm 89,521,405                                                                                                                     | CCTTTGAGTAC | 89,521,395  |
| Hs 154,869,042 | AAACCCCAAGAGAGCT <sup>*</sup> CGGTCTCTATCACCATAACAACAATTCCAAACATCCCAAAAATC                                                        |             | 154,869,101 |
| Rm 129,130,360 | AAACCCCAAGAGAGCT <sup>*</sup> CGGTCTCTATCACCATAACAACAATTCCAAACATCCCAAAAATC                                                        |             | 129,130,419 |
| Mm 89,521,394  | AAACCCCAAGACAGTT <sup>*</sup> CGGTCTCTATCACCATAACAACAATTCCAAACATCCCAAAAATC                                                        |             | 89,521,335  |
| Hs 154,869,102 | AGAGCATAGTCACTCAGT <sup>*</sup> CGCTTTCTCTTTTCAAACAGGGCCCTCCTGTGTCCAGCTTA                                                         |             | 154,869,161 |
| Rm 129,130,420 | AGAGCATAGTCACTCAGT <sup>*</sup> CGCTTTCTCTTTTCAAACAGGGCCCTCCTGTGTCCAGCTTA                                                         |             | 129,130,479 |
| Mm 89,521,334  | AGAGCATAGTCACTCAGT <sup>*</sup> CGCTTTCTCTTTTCAAACAGGGCCCTCCTGTGTCCAGCTTA                                                         |             | 89,521,275  |
| Hs 154,869,162 | TAGCCAATGTTTTGGTTTTT <sup>*</sup> CGCTTGTTGGCTTTGGGGAAGGTGGTGCTGCTGG <sup>*</sup> CGGTG                                           |             | 154,869,221 |
| Rm 129,130,480 | TAGCCAATGTTTTGGTTTTT <sup>*</sup> CGCTTGTTGGCTTTGGGGAAGGTGGTGCTGCTGG <sup>*</sup> CGGTG                                           |             | 129,130,539 |
| Mm 89,521,274  | TAGCCAATGTTTTGGTTTTT <sup>*</sup> CGCTTGTTGGCTTTGGGGAAGGTGGTGCTGCTGG <sup>*</sup> CGGTG                                           |             | 89,521,215  |
| Hs 154,869,222 | GTGC <sup>*</sup> CGGCATGCTGGTGGTTGTGGGTGGCATTAGGGTGATGGAGCAGGGTCTGGTGGGCA                                                        |             | 154,869,281 |
| Rm 129,130,541 | GTGC <sup>*</sup> CGGCATGCTGGTGGTTGTGGGTGGCATTAGGGTGATGGAGCAGGGTCTGGTGGGCA                                                        |             | 129,130,599 |
| Mm 89,521,214  | GTGC <sup>*</sup> CGGCATGCTGGTGGTTGTGGGTAGC <sup>*</sup> TTGGGGTGATGGAGCAGAGTCTGGTGGGCA                                           |             | 89,521,155  |
| Hs 154,869,282 | TGGTTGTCTCC <sup>*</sup> CGGGAGGAGATGAC <sup>*</sup> CGATCTC <sup>*</sup> CGGGGGGTTGCTAGGGCTGAAAAGCTGG                            |             | 154,869,341 |
| Rm 129,130,600 | TGGTTGTCTCC <sup>*</sup> CGGGAGGAGATGAC <sup>*</sup> CGATCTC <sup>*</sup> CGGGGGGTTGCTAGGGCTGAAAAGCTGG                            |             | 129,130,659 |
| Mm 89,521,154  | TGGTTATCTCC <sup>*</sup> CGGGAGGAGATGATAATCTCTGGGGGGTTGCTGGGACTGAAGAGCTGG                                                         |             | 89,521,095  |
| Hs 154,869,342 | AGGGGTTGGCCCTCAGTCT <sup>*</sup> CGGCCT <sup>*</sup> CGATGAGGTTCTC <sup>*</sup> CGGGAGG <sup>*</sup> CGCTGAGG <sup>*</sup> CGGCTG |             | 154,869,401 |
| Rm 129,130,660 | AGGGGTTGGCCCTCAGTCT <sup>*</sup> CGGCCT <sup>*</sup> CGATGAGGTTCTC <sup>*</sup> CGGGAGG <sup>*</sup> CGCTGAGG <sup>*</sup> CGGCTG |             | 129,130,719 |
| Mm 89,521,094  | AGGGGTTGGCCCTCAGGCTCAGCCT <sup>*</sup> CGATAAGGTTCTC <sup>*</sup> CGAGAGG <sup>*</sup> CGCTGAGG <sup>*</sup> CGGCTG               |             | 89,521,035  |
| Hs 154,869,402 | AGGGGCTTCATGACCCAC <sup>*</sup> CGCTATACTTGCAGGAGCTCATGG <sup>*</sup> CGATCTC <sup>*</sup> CGTGAAGGGG                             |             | 154,869,461 |
| Rm 129,130,720 | AGGGGCTTCATGACCCAC <sup>*</sup> CGCTATACTTGCAGGAGCTCATGG <sup>*</sup> CGATCTC <sup>*</sup> CGTGAAGGGG                             |             | 129,130,779 |
| Mm 89,521,034  | AGGGGCTTCATGACCCAC <sup>*</sup> CGCTGATTTGCAGGAGCTCATAGCTATCTC <sup>*</sup> CGTGAAGGGA                                            |             | 89,520,975  |
| Hs 154,869,462 | TTGCTGTCC <sup>*</sup> CGCCGGTGCACCAGGGGGCTGGCCTGT <sup>*</sup> CGGTGCC <sup>*</sup> CGGCTGCCTC <sup>*</sup> CGCCAGGC             |             | 154,869,521 |
| Rm 129,130,780 | TTGCTGTCC <sup>*</sup> CGCCGGTGCACCAGGGGGCTGGCCTGT <sup>*</sup> CGGTGCC <sup>*</sup> CGGCTGCCTC <sup>*</sup> CGCCAGGC             |             | 129,130,839 |
| Mm 89,520,974  | TTGCTGTCC <sup>*</sup> CGCCGGTGCACCAGGGGGCTGGCCTGT <sup>*</sup> CGGTGCC <sup>*</sup> CGGCTGCCTC <sup>*</sup> CGCCAGGC             |             | 89,520,915  |
| Hs 154,869,522 | CCAATTGTAGCTGTGGAACCTGGAGAGTGGCCAAGCAAGTGGTCATTGAGATTGAGCTGG                                                                      |             | 154,869,581 |
| Rm 129,130,840 | CCAATTGTAGCTGTGGAACCTGGAGAGTGGCCAAGCAAGTGGTCATTGAGATTGAGCTGG                                                                      |             | 129,130,899 |
| Mm 89,520,914  | CCAATTGTGGCTGTGGAACCTGGAGAGTGGCCAAGCAAGTGGTCATTGAGATTGAGCTGG                                                                      |             | 89,520,855  |
| Hs 154,869,582 | CTGCCTTGCCTGGAGGAAGGGTGGAGGATGG <sup>*</sup> CGGTGGAGTTGGAC <sup>*</sup> CGAAGGGGGGGCCCTG                                         |             | 154,869,641 |
| Rm 129,130,900 | CTGCCTTGCCTGGAGGAAGGGTGGAGGATGG <sup>*</sup> CGGTGGAGTTGGAC <sup>*</sup> CGAAGGGGGGGCCCTG                                         |             | 129,130,959 |
| Mm 89,520,854  | CTGCCTTGCCTGGAGGAAGGGTGGAGGATGG <sup>*</sup> CGGTAGAGTTGGCTGAAGTGGGGGGCCCTG                                                       |             | 89,520,795  |
| Hs 154,869,642 | AAAG <sup>*</sup> CGGTGGGAGAGGAGTGCAGCAGGCCAGGGTGGACGGGCTGGCTCTGGAGTTGGGCG                                                        |             | 154,869,701 |
| Rm 129,130,960 | AAAG <sup>*</sup> CGGTGGGAGAGGAGTGCAGCAGGCCAGGGTGGACGGGCTGGCTCTGGAGTTGGGCG                                                        |             | 129,131,019 |
| Mm 89,520,794  | AACGCGTGGGAGAAGAGTGCACAGACC <sup>*</sup> AGGATGGAC <sup>*</sup> AAGCTGGCTCTGGAGTTGGGCA                                            |             | 89,520,735  |

**Supplemental Fig. 2.** Sequence homology of MR-ex 1 (exon 1/intron 1) across human, macaque and mouse. The start and stop of the differentially methylated region spanning 646 base pairs is shown by green and red arrows, respectively. Conserved CpGs within MR-ex1 are shown in bold, red font. CpGs unique to a species are underlined. Nucleotides that are not conserved across species are shown in italic. “\*” and “\*” are CpGs that are significantly different in HD/VHD monkeys and CIE-exposed drinking mice, respectively.

# Supplemental Figure 3

## *KCNN3* MR-ex1

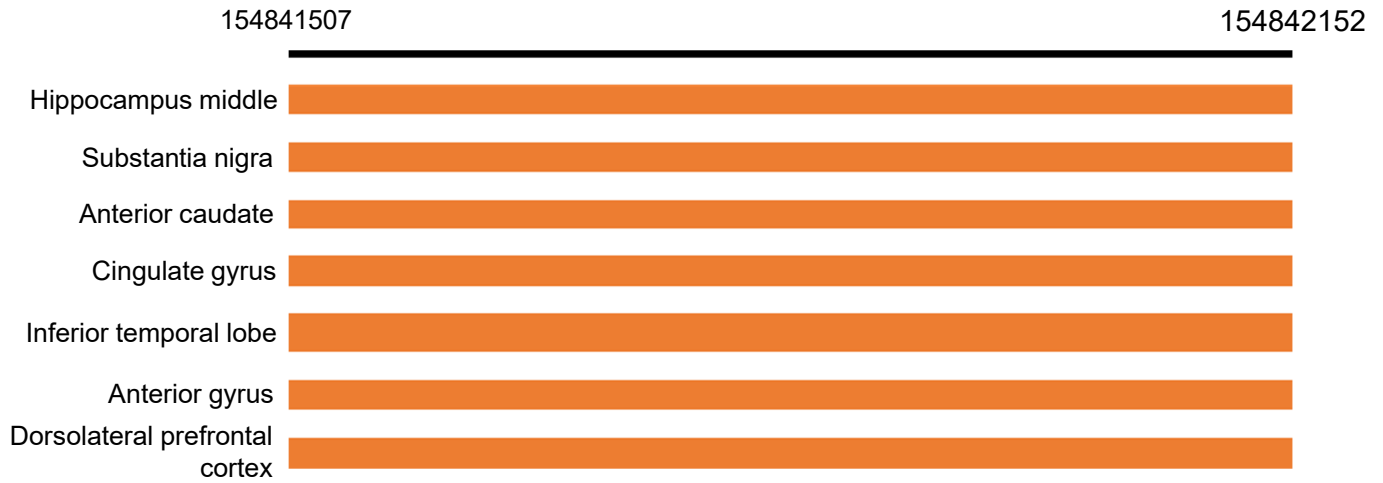

**Supplemental Fig. 3.** Overlap of the macaque homologous methylation region within MR-ex1 on the human Roadmap 25 chromatin states. The MR-ex1 region on the human genome (hg19) is located at chr1: 154,841,507-154,842,152. According to the Roadmap Epigenomic project, the orange color in the 25 chromatin states represents “promoter upstream transcription start site”. Note that the nucleus accumbens is not included in the Epigenomics Roadmap database.

# Supplemental Figure 4

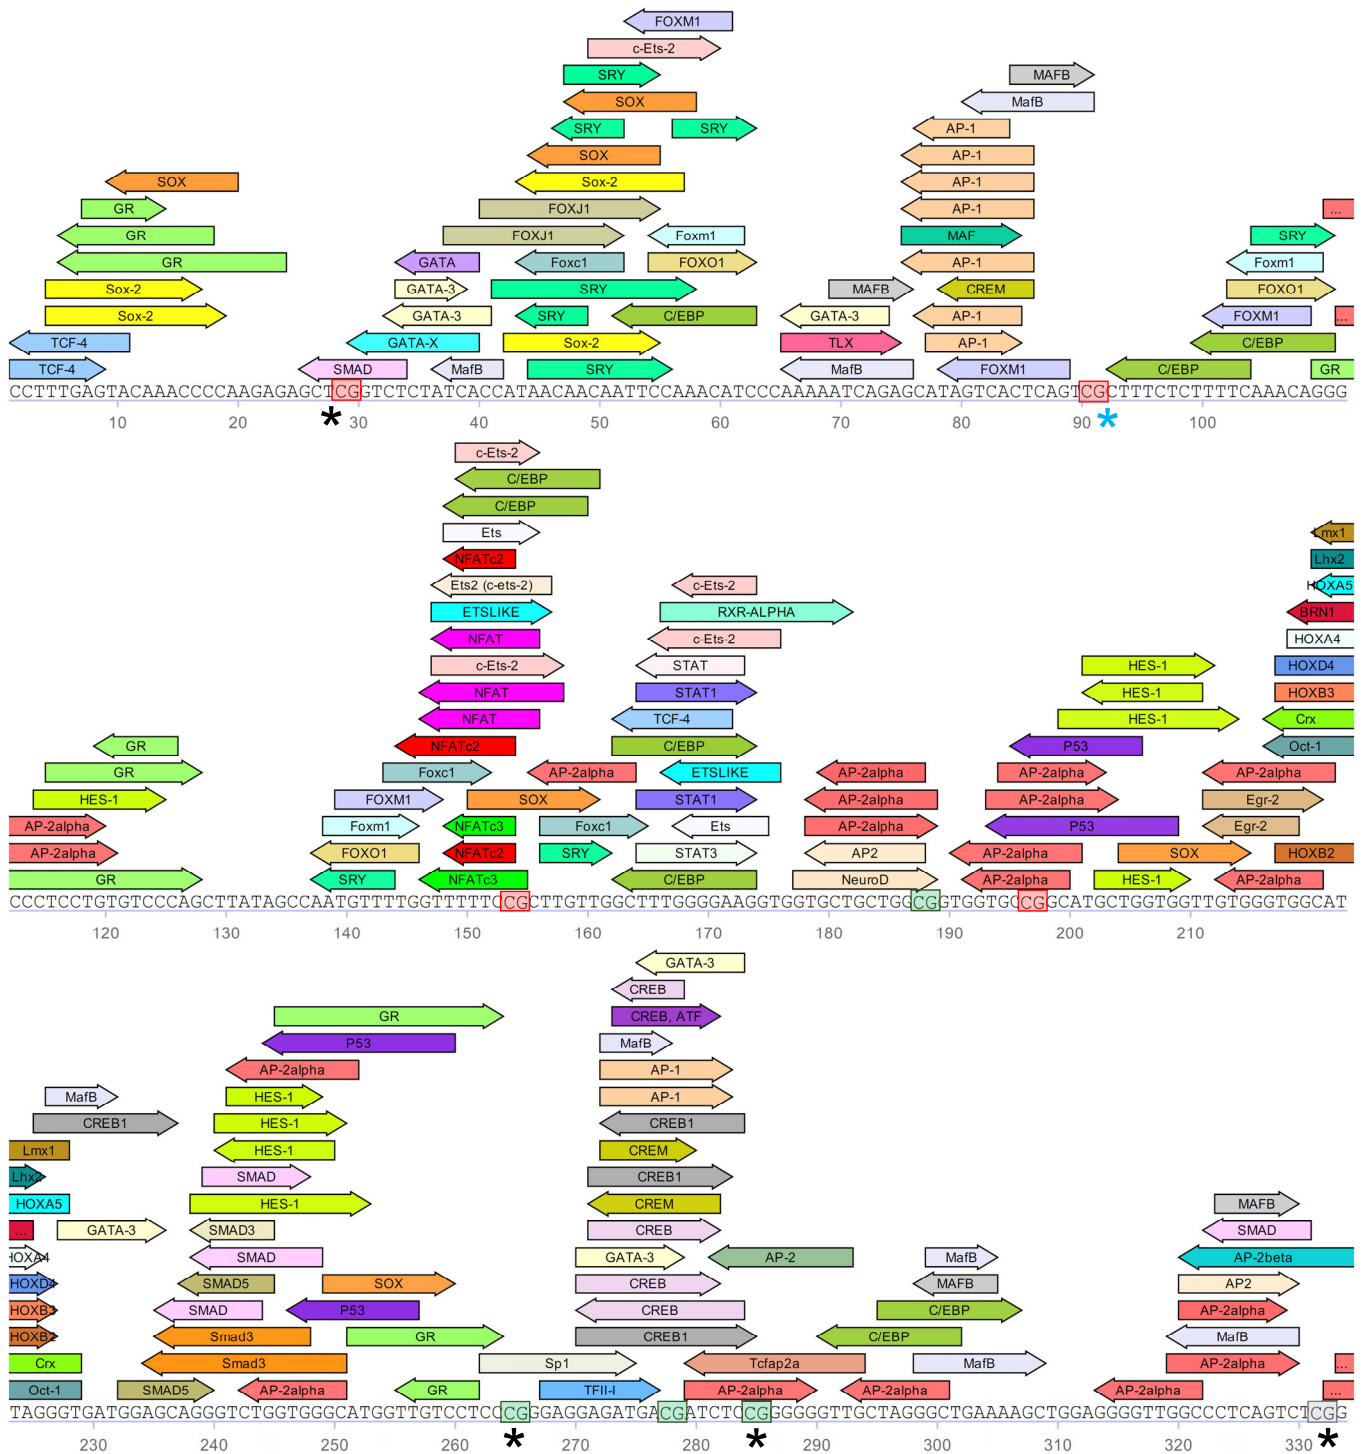

**Supplemental Fig. 4.** Predicted transcription factors that bind to the human MR-ex1 (TRANSFAC). CpGs enclosed in a red box are conserved in human, monkey and mouse; those CpGs unique to human are enclosed in a grey box, and those conserved in human and monkey are enclosed in a green box. '\*' and '\*\*' are CpGs that are significantly different in HD monkeys and CIE-exposed drinking mice, respectively. TRANSFAC conditions were as follows: nerve\_system\_specific matrices, matrix similarity cut-off: 0.9 and core similarity cut-off: 0.95.

# Supplemental Figure 4, cont.

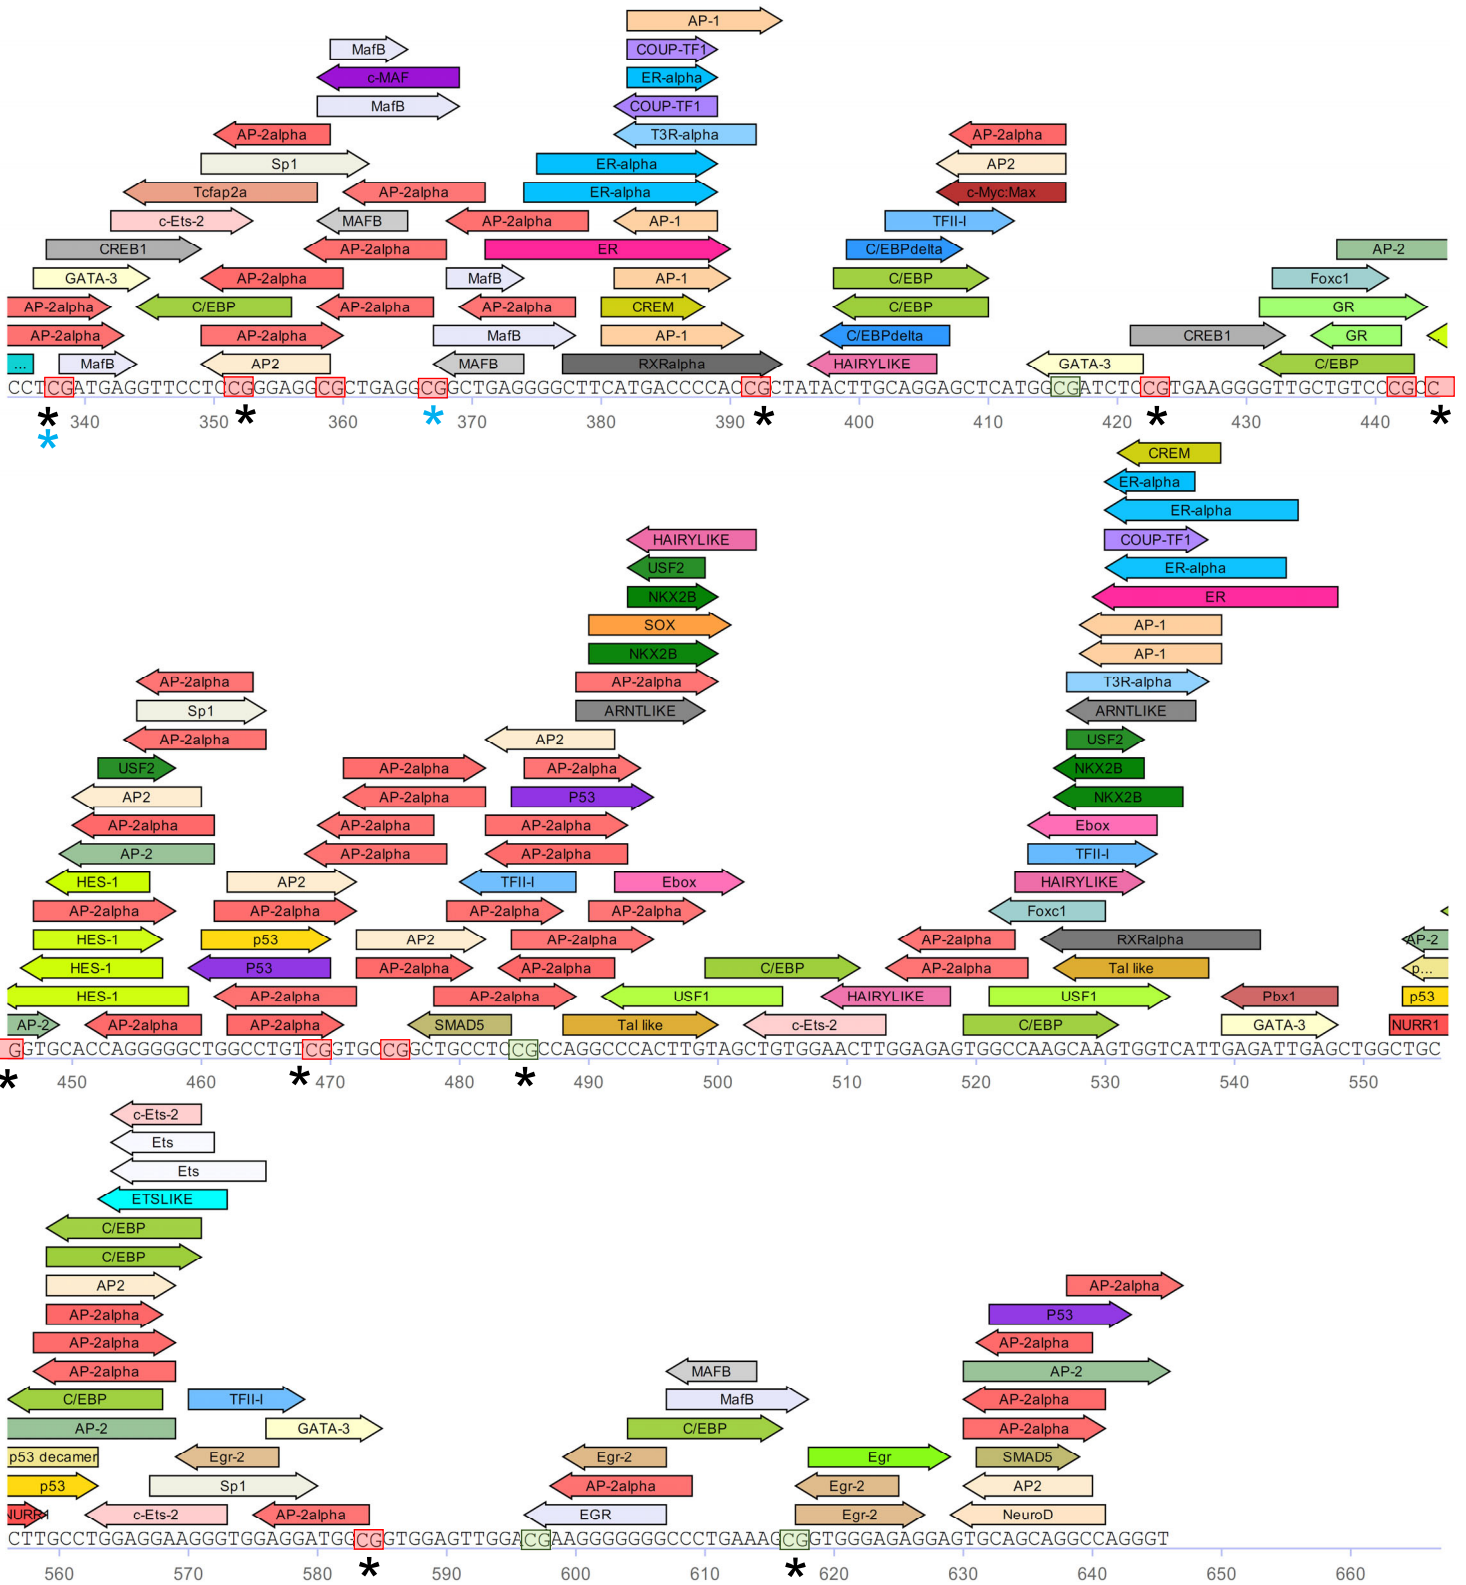

# Supplemental Figure 5

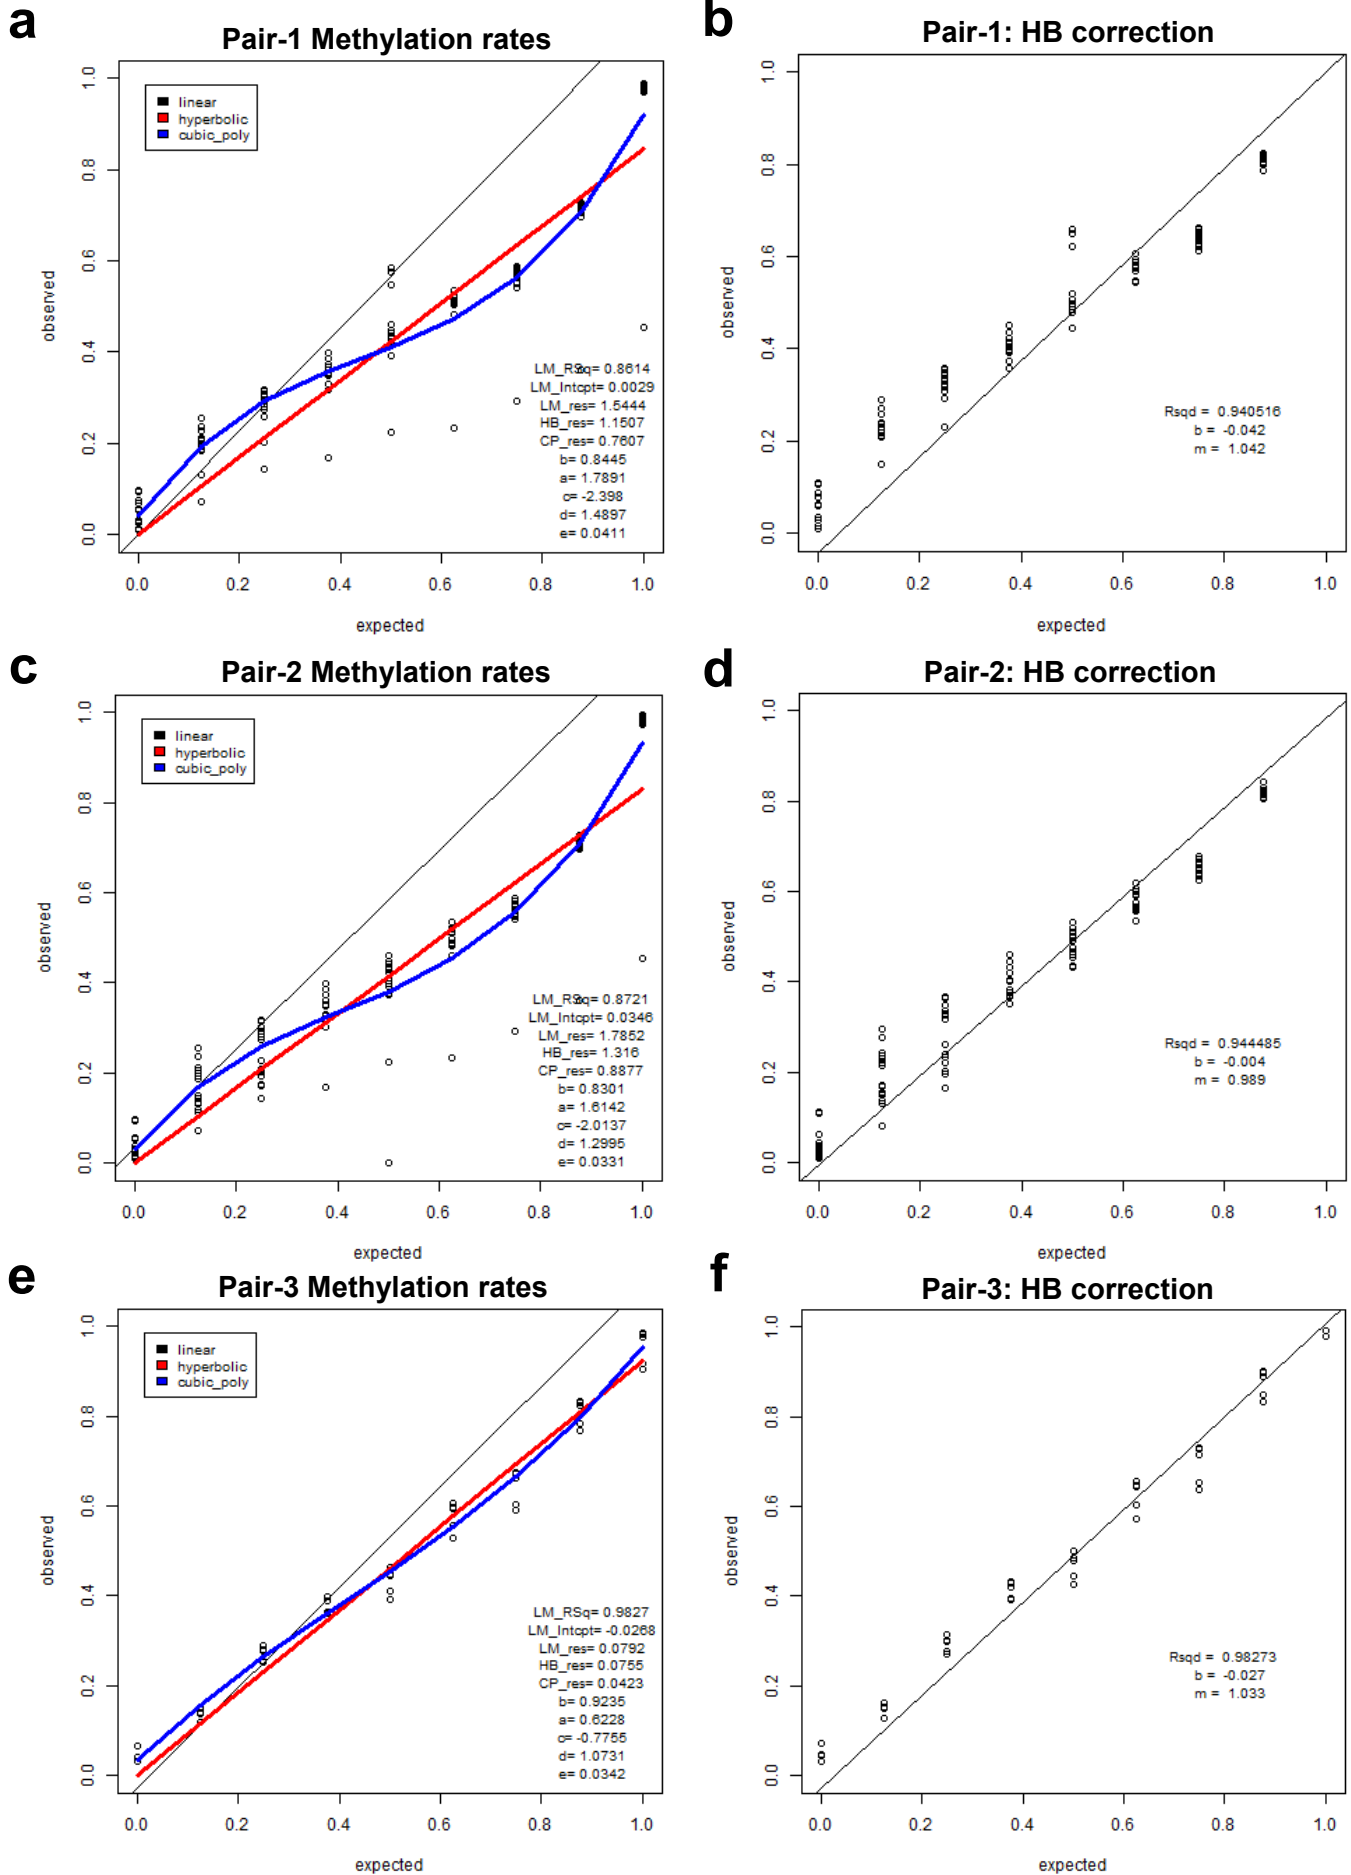

**Supplemental Fig. 5. Titration curves to correct for PCR bias during amplification of the methylation region under study.** Three different amplicons were used to amplify the complete region 1 (a), 2 (c) and 3 (e). PCR-bias was corrected using the hyperbolic function (HB, b, d and f).
